# Supplementary material for: Artificial Nanoscale Erythrocytes from Clinically Relevant Compounds for Enhancing Cancer Immunotherapy
Source: PubMed Central journal article supplement (PMC7770689; doi:10.1007/s40820-020-00428-y), 2020-04-13
Supplement: 40820_2020_428_MOESM1_ESM.pdf [file 40820_2020_428_MOESM1_ESM.pdf]

Supporting Information for

## Artificial Nanoscale Erythrocytes from Clinically Relevant Compounds for Enhancing Cancer Immunotherapy

Wenquan Ou<sup>1</sup>, Kang Sik Nam<sup>2</sup>, Dae Hoon Park<sup>2</sup>, Jungho Hwang<sup>2,\*</sup>, Sae Kwang Ku<sup>3</sup>, Chul Soon Yong<sup>1</sup>, Jong Oh Kim<sup>1,\*</sup>, Jeong Hoon Byeon<sup>4,\*</sup>

<sup>1</sup>College of Pharmacy, Yeungnam University, Gyeongsan 38541, Republic of Korea

<sup>2</sup>School of Mechanical Engineering, Yonsei University, Seoul 03722, Republic of Korea

<sup>3</sup>College of Korean Medicine, Daegu Haany University, Gyeongsan 38610, Republic of Korea

<sup>4</sup>School of Mechanical Engineering, Yeungnam University, Gyeongsan 38541, Republic of Korea

Wenquan Ou and Kang Sik Nam contributed equally to this work

\*Corresponding authors. E-mail: hwangjh@yonsei.ac.kr (Jungho Hwang); jongohkim@yu.ac.kr (Jong Oh Kim); postjb@yu.ac.kr (Jeong Hoon Byeon)

### Supplementary Figures and Tables

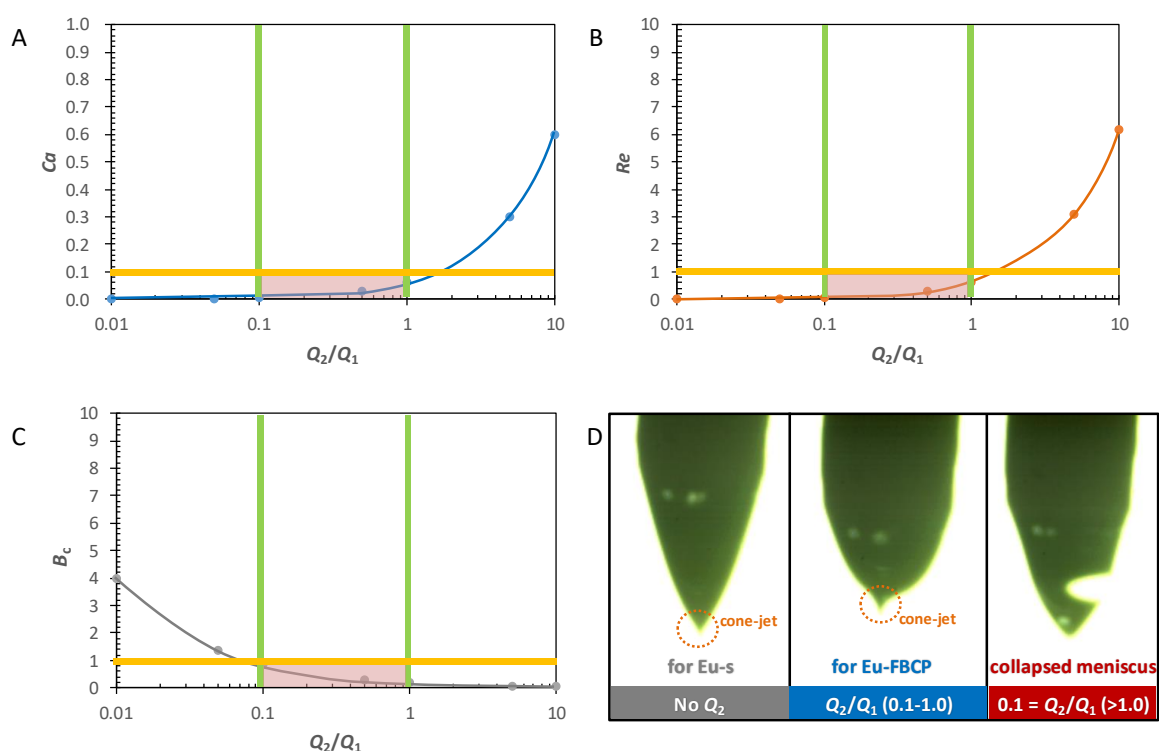

**Fig. S1** Mechanical and electrical parameters with high-speed camera images of the two-phase electrospray. (A, B) Capillary ( $Ca$ ) and Reynolds ( $Re$ ) numbers as a function of volumetric flow ratio between the Eu/PTX solution ( $Q_1$ ) and air ( $Q_2$ ). (C) Characteristic balance ( $B_c$ ) between the  $B_E^2$  and  $CaRe$  exhibiting a balance between the electrical and mechanical parameters of the electrospray. (D) High-speed camera images of meniscus shapes from different  $Q_2/Q_1$  operations

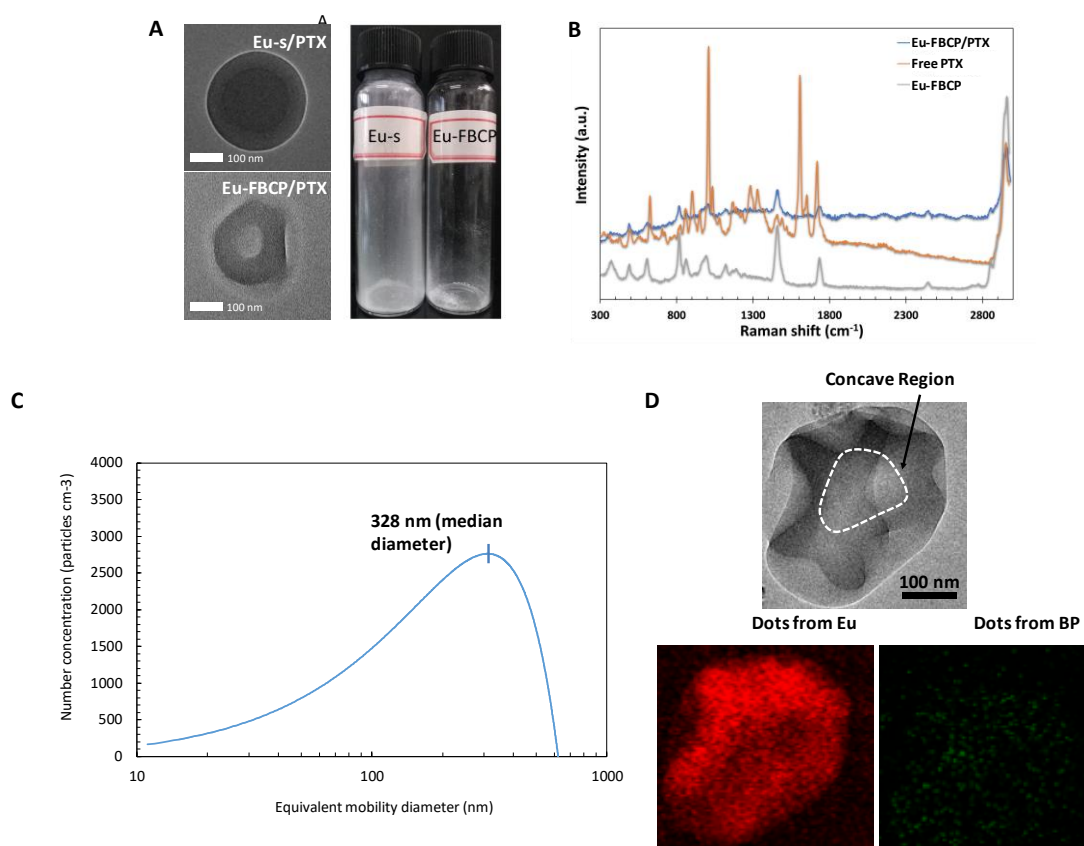

**Fig. S2** (A) High-resolution TEM and digital images of collected powder forms of Eu-s/PTX (from single-phase electrospay) and Eu-FBCP/PTX (from two-phase electrospay). The TEM images exhibit clear difference in core region contrast between Eu-s/PTX (thick core) and Eu-FBCP/PTX (thin core). (B) Raman spectra of Eu-FBCP/PTX, as well as individual PTX and Eu-FBCP. (C) In-flight size distribution of Eu-FBCP/PTX observed using a SMPS by direct vacuum sampling of floating particles right after electrospaying. (D) A representative TEM image and its energy-dispersive X-ray maps (red: carbon dots, green: phosphorus dots) from electrospay of BP NP included Eu/PTX solution

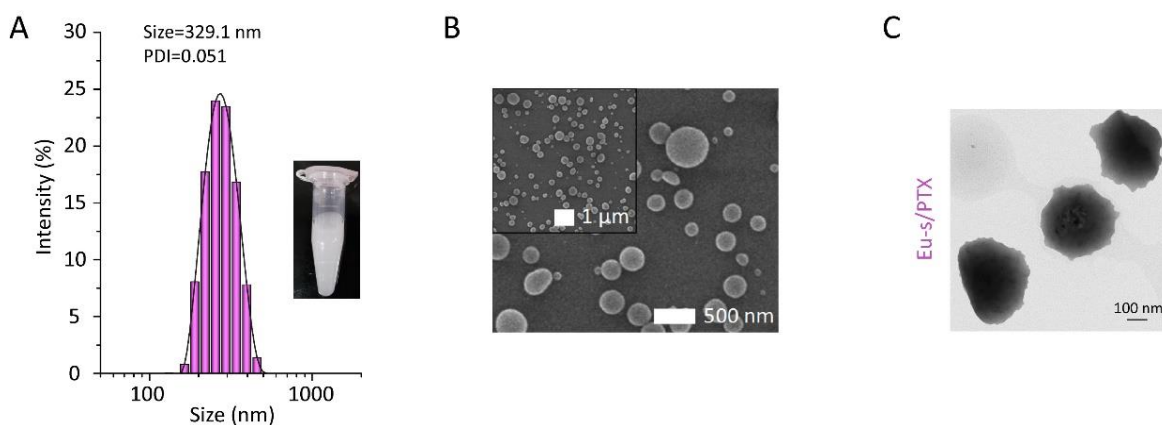

**Fig. S3** Physical characterization of Eu-s/PTX for comparison. (A) DSL size distribution of Eu-s/PTX dispersed in PBS (refer to the inset digital image). (B, C) SEM (low- and high-magnification) and TEM images of Eu-s/PTX collected on a carbon-coated copper grid

### Nano-Micro Letters

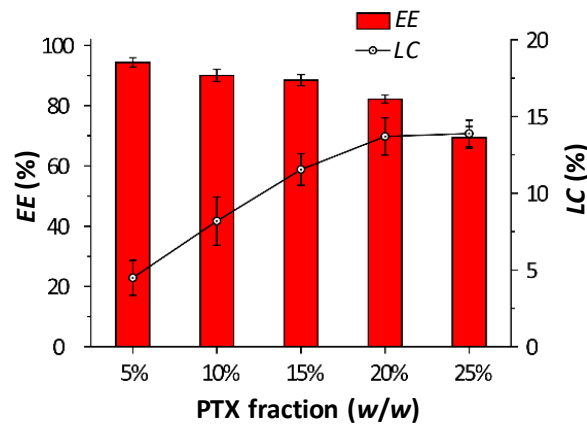

**Fig. S4** Percentage *EE* and *LC* profiles of Eu-FBCP/PTX with increasing PTX content from 5% to 25% (PTX-to-Eu weight ratio) (n = 6)

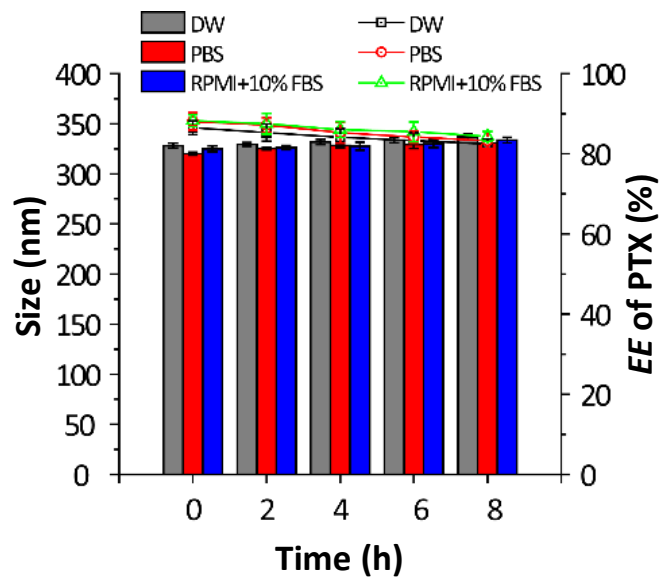

**Fig. S5** Time profiles of mean DLS size and *EE* of Eu-FBCP/PTX dispersed in DW, PBS, or RPMI + 10% FBS for 8 h (n = 6)

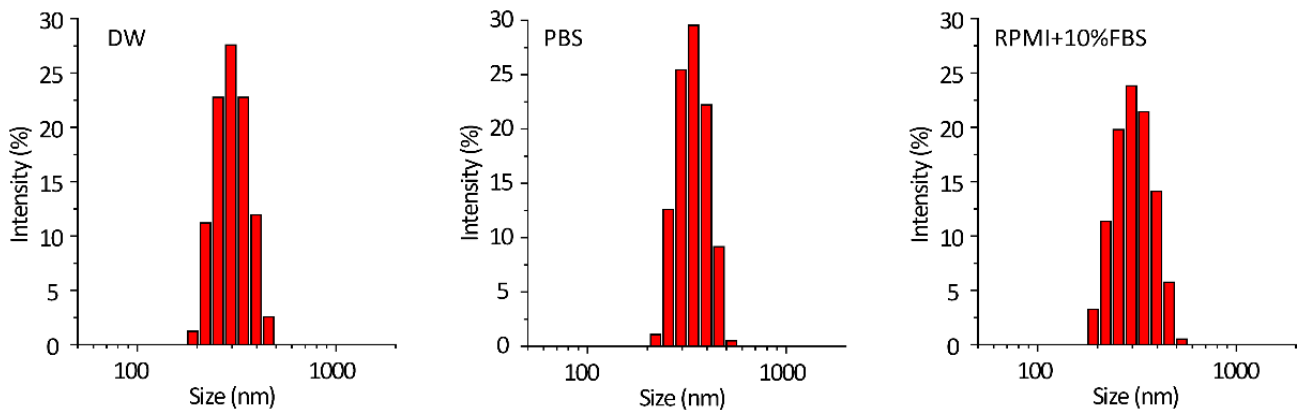

**Fig. S6** DLS size distributions of Eu-FBCP/PTX after 8 h dispersed in DW, PBS, and RPMI + 10% FBS

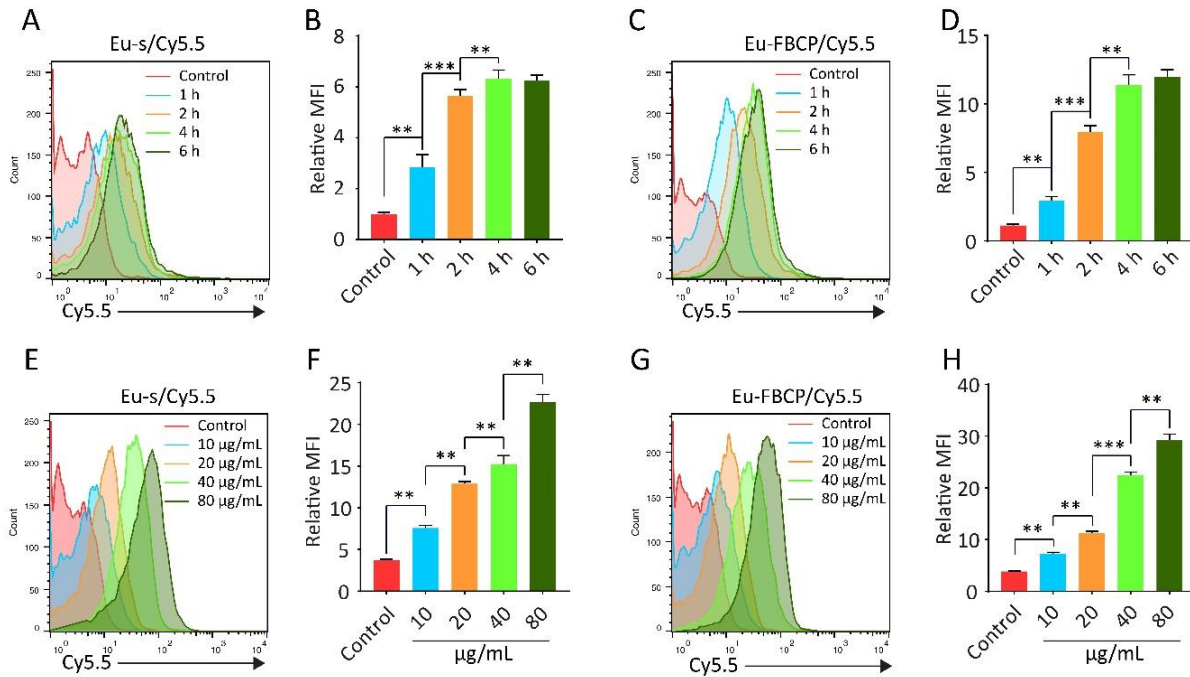

**Fig. S7** FACS analyses to examine time- and dose-dependent cellular uptake of Eu-FBCP, as well as Eu-s for comparison. (A–D) Time-dependent uptake profiles and corresponding quantified indices of Cy5.5 tagged on Eu-FBCP and Eu-s under an identical dose (n = 3). (E–H) Dose-dependent uptake profiles and corresponding quantified indices of Cy5.5 tagged on Eu-FBCP and Eu-s under an identical incubation time (n = 3; \*\*  $p < 0.01$  and \*\*\*  $p < 0.001$ )

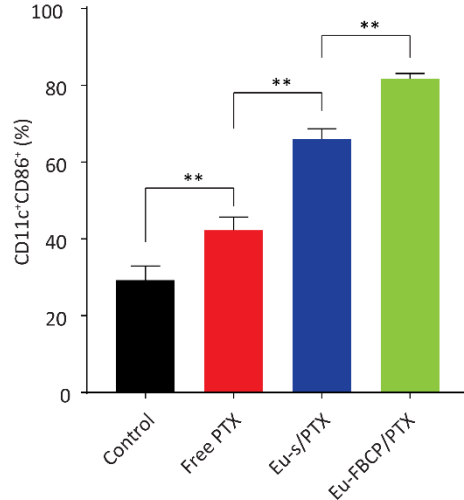

**Fig. S8** Mature DCs exposed to tumor-associated antigen generated from MC-38 cells treated with Eu-FBCP/PTX, as well as free PTX and Eu-s/PTX for comparison. CD11c<sup>+</sup>CD86<sup>+</sup> cells are the indicators of mature DCs (n = 3; \*\*  $p < 0.01$ ).

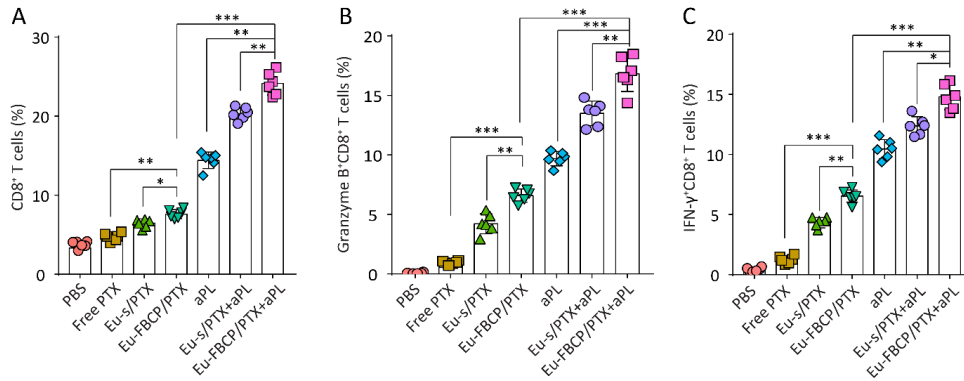

**Fig. S9** (A) Infiltrating CD8<sup>+</sup> T cells in tumor microenvironment after treatments with Eu-FBCP/PTX and Eu-FBCP/PTX + aPL, as well as PBS, free PTX, aPL, Eu-s/PTX, and Eu-s/PTX + aPL for comparison (n = 6). (B, C) Intratumoral granzyme B<sup>+</sup> and IFN- $\gamma$ <sup>+</sup>CD8<sup>+</sup> T cells after the treatments (n = 6; \*  $p < 0.05$ , \*\*  $p < 0.01$ , and \*\*\*  $p < 0.001$ )

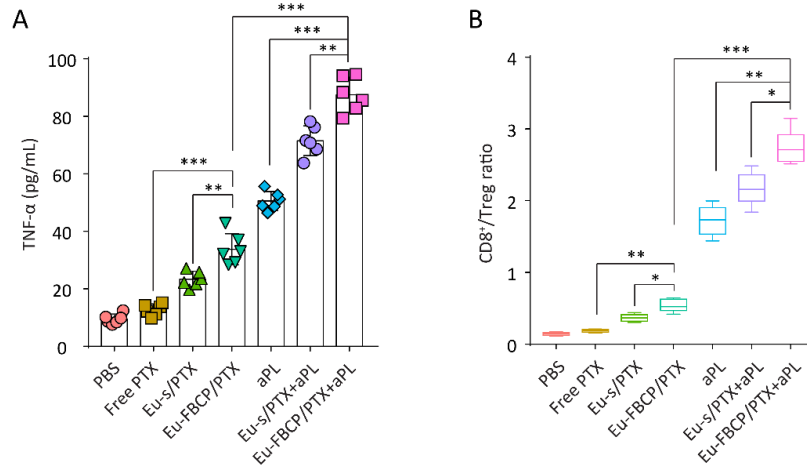

**Fig. S10** (A) TNF- $\alpha$  levels in tumor microenvironment from mice treated with Eu-FBCP/PTX and Eu-FBCP/PTX + aPL, as well as PBS, free PTX, aPL, Eu-s/PTX, and Eu-s/PTX + aPL for comparison (n = 6). (B) Infiltrating CD8<sup>+</sup> T-to-Treg cell ratios in tumors isolated from the treated mice (n = 6; \*  $p < 0.05$ , \*\*  $p < 0.01$ , and \*\*\*  $p < 0.001$ )

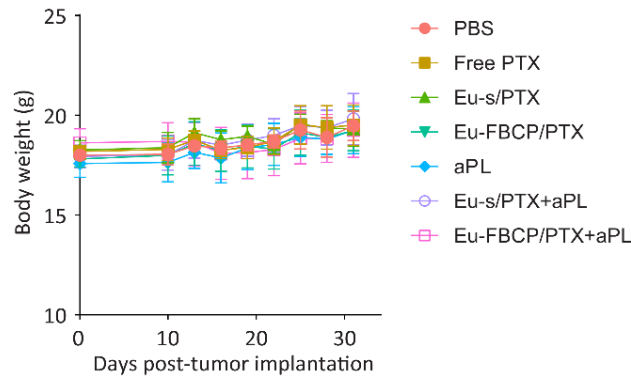

**Fig. S11** Body weight profiles of MC-38 tumor-bearing mice treated with Eu-FBCP/PTX and Eu-FBCP/PTX + aPL, as well as PBS, free PTX, aPL, Eu-s/PTX, and Eu-s/PTX + aPL for comparison (n = 6)

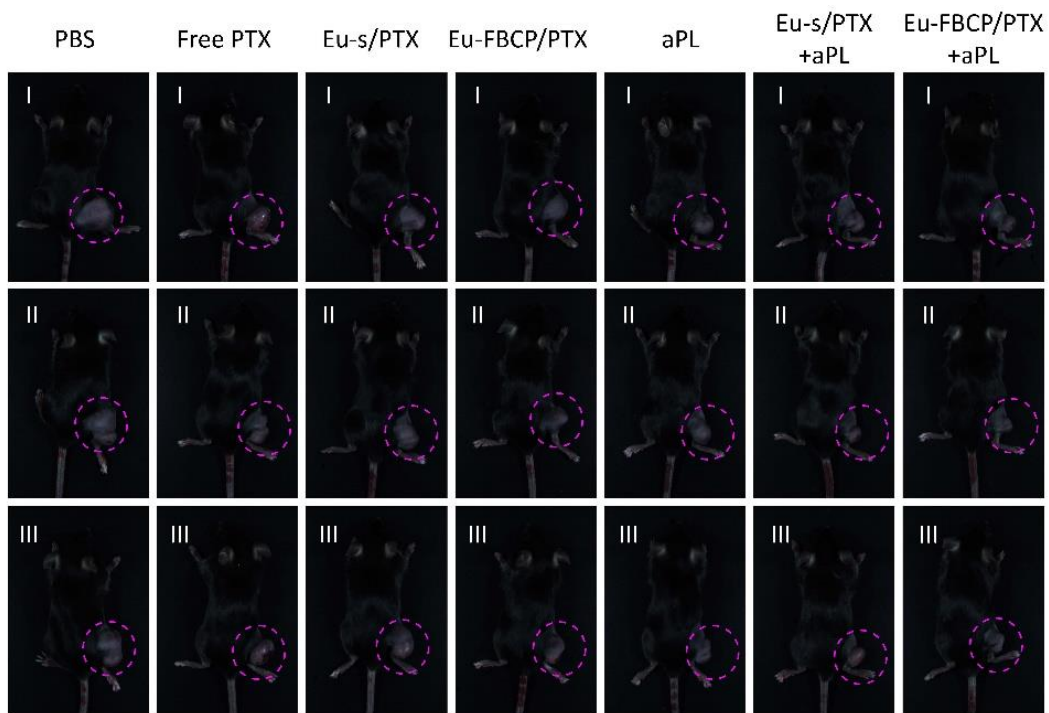

**Fig. S12** Digital images of mice taken at the final day after treatments with Eu-FBCP/PTX and Eu-FBCP/PTX + aPL, as well as PBS, free PTX, aPL, Eu-s/PTX, and Eu-s/PTX + aPL for comparison

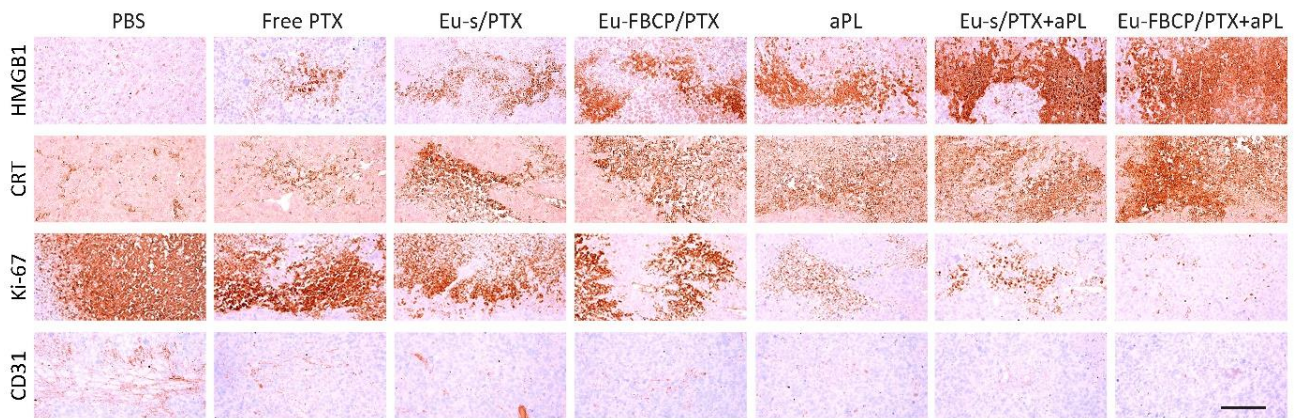

**Fig. S13** Histopathological and immunohistochemical images to assess levels of HMGB1, CRT, Ki-67, and CD31 in tumors obtained from MC-38 tumor-bearing mice treated with Eu-FBCP/PTX and Eu-FBCP/PTX + aPL, as well as PBS, free PTX, aPL, Eu-s/PTX, and Eu-s/PTX + aPL for comparison

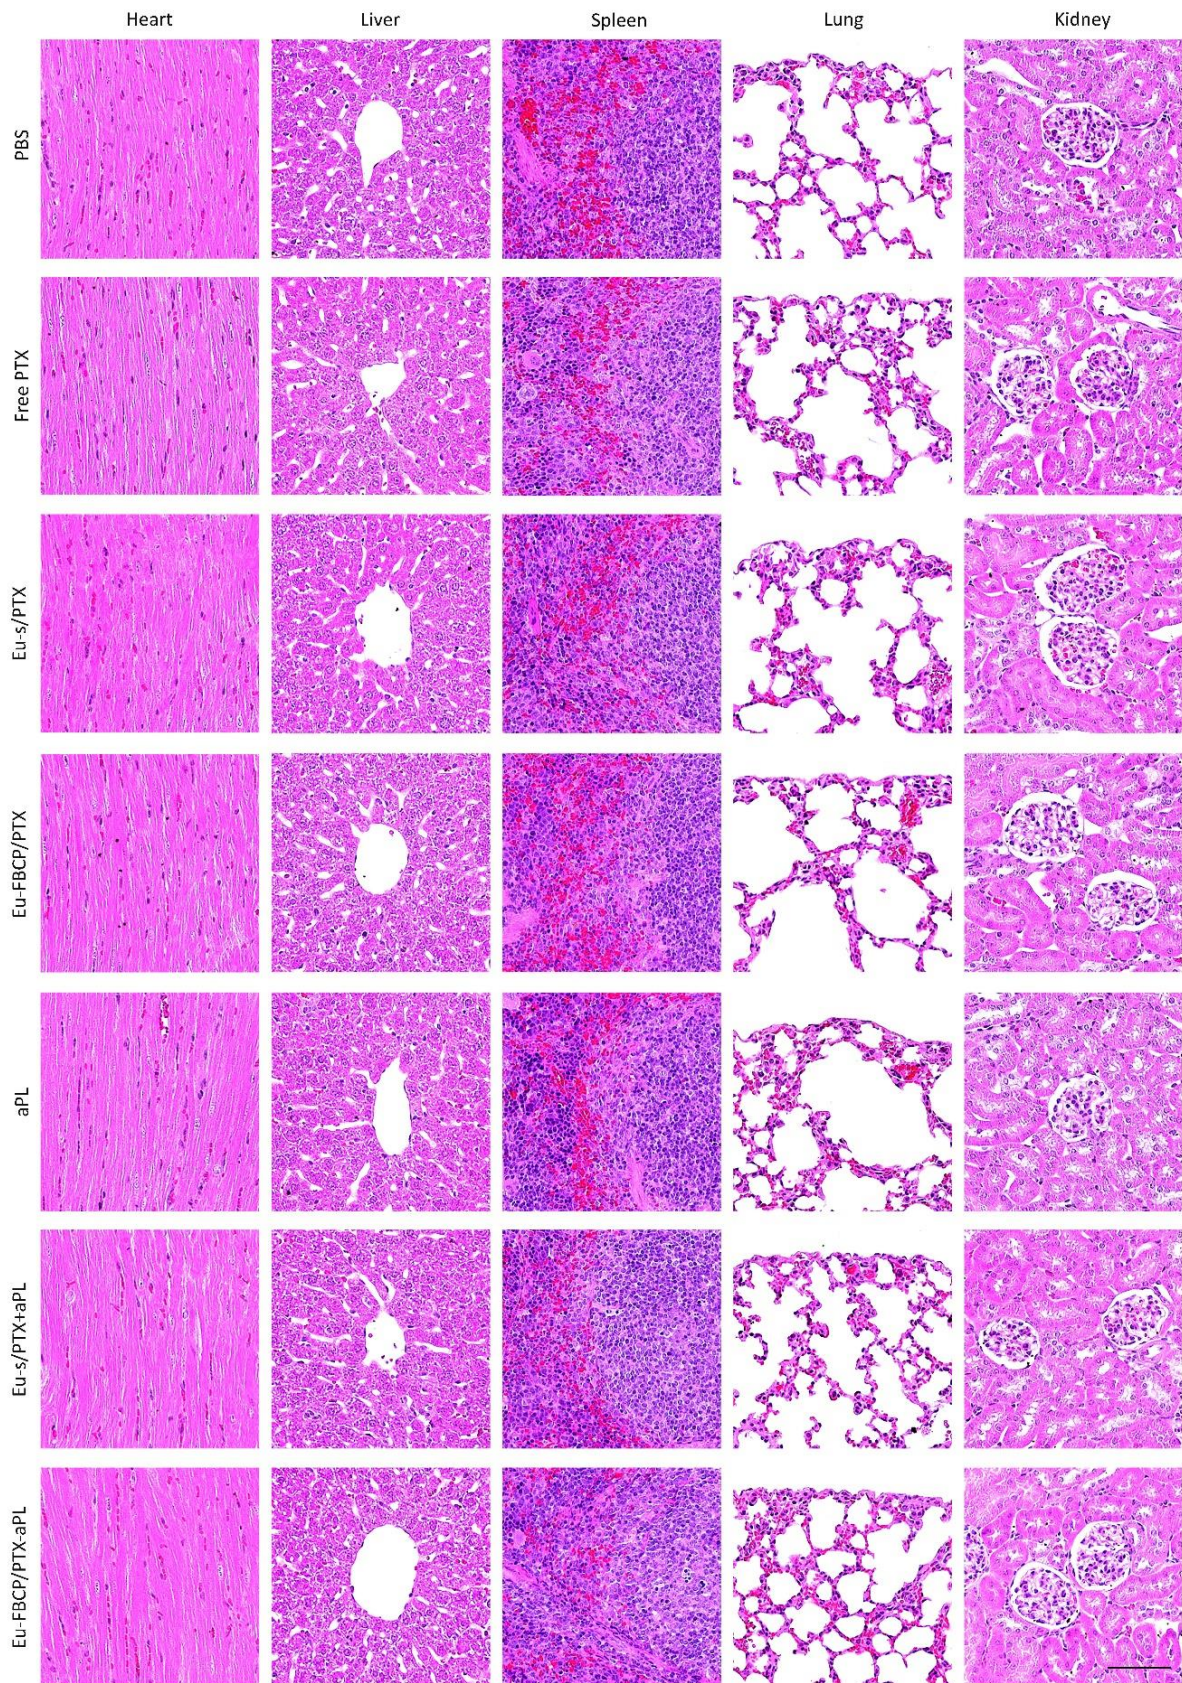

**Fig. S14** *In vivo* histopathological images for hearts, livers, spleens, lungs, and kidneys isolated from mice treated with Eu-FBCP/PTX and Eu-FBCP/PTX + aPL, as well as PBS, free PTX, aPL, Eu-s/PTX, and Eu-s/PTX + aPL for comparison

## Nano-Micro Letters

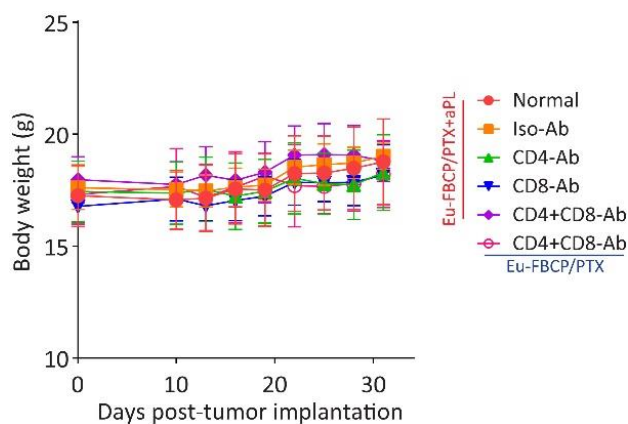

**Fig. S15** Body weight profiles of differently immunocompromized mice during treatments with Eu-FBCP/PTX with and without aPL

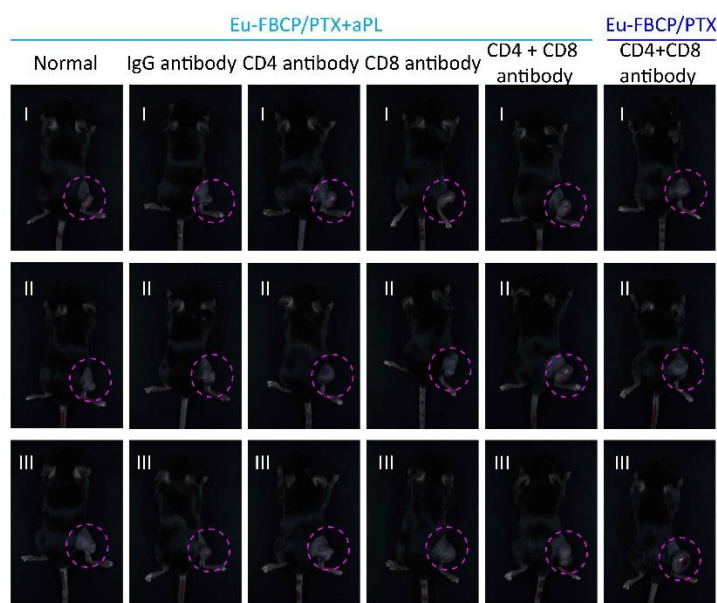

**Fig. S16** Digital images of differently immunocompromized mice taken at the final day after treatments with Eu-FBCP/PTX with and without aPL

**Table S1** Summary of DSL size distributions of Cy5.5-labeled Eu (RL or RS)-FBCP and Eu (RL or RS)-s

| Groups             | Size (nm)   | PDI           |
|--------------------|-------------|---------------|
| Eu-s/Cy5.5 (RL)    | 318.7 ± 2.5 | 0.109 ± 0.014 |
| Eu-FBCP/Cy5.5 (RL) | 321.3 ± 1.8 | 0.094 ± 0.008 |
| Eu-s/Cy5.5 (RS)    | 322.2 ± 3.1 | 0.142 ± 0.017 |
| Eu-FBCP/Cy5.5 (RS) | 321.4 ± 2.6 | 0.111 ± 0.036 |



**Table S2** Histomorphometrical analysis of tumor masses, taken from MC-38 allograft tumor-bearing mice treated with Eu-FBCP/PTX and Eu-FBCP/PTX + aPL, as well as PBS, free PTX, aPL, Eu-s/PTX, and Eu-s/PTX + aPL for comparison

| Groups<br>Items                                                   | G1<br>(PBS control) | Test formula treated groups |                            |                            |
|-------------------------------------------------------------------|---------------------|-----------------------------|----------------------------|----------------------------|
|                                                                   |                     | G2                          | G3                         | G4                         |
| TCV (%/mm <sup>2</sup> )                                          | 87.57±4.88          | 74.12±3.92 <sup>a</sup>     | 62.86±3.55 <sup>ab</sup>   | 50.74±5.22 <sup>abd</sup>  |
| Immunoreactive cell percentages (%/mm <sup>2</sup> of tumor mass) |                     |                             |                            |                            |
| Cleaved-Caspase-3                                                 | 4.83±1.95           | 14.84±3.42 <sup>a</sup>     | 25.43±3.51 <sup>ab</sup>   | 39.66±3.72 <sup>abd</sup>  |
| Cleaved-Caspase-9                                                 | 6.93±2.52           | 15.65±3.10 <sup>a</sup>     | 21.40±2.83 <sup>ac</sup>   | 37.25±3.40 <sup>abd</sup>  |
| KI-67                                                             | 53.12±6.45          | 40.18±4.02 <sup>h</sup>     | 32.03±3.47 <sup>hj</sup>   | 23.03±3.09 <sup>hik</sup>  |
| CD31                                                              | 47.65±2.96          | 36.39±3.14 <sup>a</sup>     | 29.64±2.83 <sup>ab</sup>   | 23.35±2.35 <sup>abd</sup>  |
| HMGB1                                                             | 2.64±1.17           | 12.80±2.72 <sup>a</sup>     | 23.55±3.27 <sup>ab</sup>   | 37.36±4.83 <sup>abd</sup>  |
| CRT                                                               | 6.38±2.64           | 17.45±2.48 <sup>a</sup>     | 28.62±3.90 <sup>ab</sup>   | 41.11±2.81 <sup>abd</sup>  |
| Immunoreactive cell numbers (cells/mm <sup>2</sup> of tumor mass) |                     |                             |                            |                            |
| CD8                                                               | 46.33±10.31         | 139.33±29.98 <sup>h</sup>   | 279.00±19.30 <sup>hi</sup> | 378.67±24.68 <sup>hk</sup> |

  

|  | G5                           | G6                              | G7                               |
|--|------------------------------|---------------------------------|----------------------------------|
|  | 39.53±5.17 <sup>abde</sup>   | 29.42±4.36 <sup>abdef</sup>     | 15.74±4.88 <sup>abdefg</sup>     |
|  | 48.79±3.60 <sup>abde</sup>   | 64.25±4.02 <sup>abdef</sup>     | 78.79±3.49 <sup>abdefg</sup>     |
|  | 45.24±4.81 <sup>abde</sup>   | 62.95±3.77 <sup>abdef</sup>     | 76.62±4.79 <sup>abdefg</sup>     |
|  | 14.17±2.97 <sup>hikl</sup>   | 8.33±1.44 <sup>hiklm</sup>      | 3.30±1.36 <sup>hiklmn</sup>      |
|  | 18.99±2.36 <sup>abde</sup>   | 9.66±2.11 <sup>abdef</sup>      | 3.58±1.30 <sup>abdefg</sup>      |
|  | 49.09±4.17 <sup>abde</sup>   | 63.27±6.44 <sup>abdef</sup>     | 81.77±6.29 <sup>abdefg</sup>     |
|  | 53.81±5.44 <sup>abde</sup>   | 64.62±5.23 <sup>abdef</sup>     | 83.18±7.24 <sup>abdefg</sup>     |
|  | 624.33±90.77 <sup>hikl</sup> | 1419.83±310.12 <sup>hiklm</sup> | 2636.33±596.09 <sup>hiklmn</sup> |

Values are expressed as mean ± SD of six tumor mass histological fields.

Groups: G1 = PBS; G2 = free PTX; G3 = Eu-s/PTX; G4 = Eu-FBCP/PTX; G5 = aPL; G6 = Eu-s/PTX + aPL; and G7 = Eu-FBCP/PTX + aPL.

<sup>a</sup>*p* < 0.01 as compared to G1 by Fisher's least significant difference (LSD) test;

<sup>b</sup>*p* < 0.01 and <sup>c</sup>*p* < 0.05 as compared to G2 by LSD test;

<sup>d</sup>*p* < 0.01 as compared to G3 by LSD test;

<sup>e</sup>*p* < 0.01 as compared to G4 by LSD test;

<sup>f</sup>*p* < 0.01 as compared to G5 by LSD test;

<sup>g</sup>*p* < 0.01 as compared to G6 by LSD test;

<sup>h</sup>*p* < 0.01 as compared to G1 by Mann–Whitney (MW) test;

<sup>i</sup>*p* < 0.01 and <sup>j</sup>*p* < 0.05 as compared to G2 by MW test;

<sup>k</sup>*p* < 0.01 as compared to G3 by MW test;

<sup>l</sup>*p* < 0.01 as compared to G4 by MW test;

<sup>m</sup>*p* < 0.01 as compared to G5 by MW test; and

<sup>n</sup>*p* < 0.01 as compared to G6 by MW test.
